# Supplementary material for: What is the feasibility and patient acceptability of a digital system for arm and hand rehabilitation after stroke? A mixed-methods, single-arm feasibility study of the ‘OnTrack’ intervention for hospital and home use
Source: HighWire-hosted journal article supplement (doi:10.1136/bmjopen-2022-062042), 2022-09-01
Supplement: bmjopen-2022-062042supp001_data_supplement.pdf [file bmjopen-2022-062042supp001_data_supplement.pdf]

| <b>Supplementary file 1 - Phase 1 and Phase 2 coaching structures</b> |                     |                       |                                                                                                                                                                                                                                                                                                    |
|-----------------------------------------------------------------------|---------------------|-----------------------|----------------------------------------------------------------------------------------------------------------------------------------------------------------------------------------------------------------------------------------------------------------------------------------------------|
| <b>Coaching delivery - Study phase 1</b>                              |                     |                       |                                                                                                                                                                                                                                                                                                    |
| <b>Week</b>                                                           | <b>Session</b>      | <b>Coaching phase</b> | <b>Coaching guidelines</b>                                                                                                                                                                                                                                                                         |
| W1                                                                    | Baseline assessment | <i>No coaching</i>    |                                                                                                                                                                                                                                                                                                    |
| W2                                                                    | Coaching session 1  | Onboarding            | Introduction to OnTrack / purpose, value, practical issues                                                                                                                                                                                                                                         |
| W3                                                                    | Coaching session 2  | Problem solving       | Encouraging people to discuss areas where they struggle, then facilitate coming up with ideas and strategies around problems faced during daily life situations.                                                                                                                                   |
| W4                                                                    |                     |                       |                                                                                                                                                                                                                                                                                                    |
| W5                                                                    | Coaching session 3  | Self-discovery        | Finding out new ways of doing things, trying out different activities, so that any attempt to try and find a new way around something is seen as a positive.                                                                                                                                       |
| W6                                                                    |                     |                       |                                                                                                                                                                                                                                                                                                    |
| W7                                                                    | Coaching session 4  | Goal setting          | Working with participants to identify, plan and execute steps towards a goal regardless of size and ambition. The aim is to help participants learn and get comfortable with this process under their terms.<br><br>Outcome measure collection.                                                    |
| W8                                                                    | Halfway assessment  |                       |                                                                                                                                                                                                                                                                                                    |
| W9                                                                    |                     |                       |                                                                                                                                                                                                                                                                                                    |
| W10                                                                   | Coaching session 5  | Reflection            | Looking back at achievements and failures to understand what worked and what didn't in order to adjust if necessary and look forward to where they want to be.                                                                                                                                     |
| W11                                                                   |                     |                       |                                                                                                                                                                                                                                                                                                    |
| W12                                                                   | Coaching session 6  | Signposting           | Using goals and aspirations to help participants create links that encourage social participation, community integration and/or peer support.                                                                                                                                                      |
| W13                                                                   |                     |                       |                                                                                                                                                                                                                                                                                                    |
| W14                                                                   | Final assessment    | <i>No coaching</i>    |                                                                                                                                                                                                                                                                                                    |
| <b>Coaching delivery - Study phase 2</b>                              |                     |                       |                                                                                                                                                                                                                                                                                                    |
| <b>Week</b>                                                           | <b>Session</b>      | <b>Coaching phase</b> | <b>Coaching guidelines</b>                                                                                                                                                                                                                                                                         |
| W1                                                                    | Baseline assessment | <i>No coaching</i>    | Initial contact; conversation about participant's background and present situation.                                                                                                                                                                                                                |
| W2                                                                    | Coaching session 1  | Introduction          | Focus on creating a habit of using OnTrack and charging devices. Setting the scene for coaching.                                                                                                                                                                                                   |
| W3                                                                    | Coaching session 2  | OnTrack coaching      | In-depth conversations about participants' aspirations and what's important to them.<br><br>Discussion to assess participants' understanding of stroke and rehab mechanisms, identify topics of curiosity, signpost as necessary.<br><br>Use of self-management principles (Problem Solving, Self- |
| W4                                                                    |                     |                       |                                                                                                                                                                                                                                                                                                    |
| W5                                                                    | Coaching session 3  |                       |                                                                                                                                                                                                                                                                                                    |

|     |                    |                    |                                                                                                                                                                                                                      |
|-----|--------------------|--------------------|----------------------------------------------------------------------------------------------------------------------------------------------------------------------------------------------------------------------|
| W6  |                    |                    | discovery, Goal Setting, and Reflection) and rehab guidelines to focus conversations towards reaching an agreed activity plan (however small).<br><br>Make connections between activity performed and data recorded. |
| W7  | Halfway assessment |                    |                                                                                                                                                                                                                      |
| W8  |                    |                    |                                                                                                                                                                                                                      |
| W9  | Coaching session 4 |                    |                                                                                                                                                                                                                      |
| W10 |                    |                    |                                                                                                                                                                                                                      |
| W11 | Coaching session 5 |                    |                                                                                                                                                                                                                      |
| W12 |                    |                    |                                                                                                                                                                                                                      |
| W13 | Coaching session 6 | Signposting        | Signpost to relevant resources that can be accessed by participants going forward.                                                                                                                                   |
| W14 | Final assessment   | <i>No coaching</i> | Closure; last query to ensure participants feel confident to continue their rehab on their own.                                                                                                                      |
